# Supplementary material
Source: Springer Nature journal article supplement (https://www.springermedizin.de/resource/supplementary/12891_2014_2125_MOESM3_ESM.docx/9509462)
Supplement: MOESM3 [file 9509462]

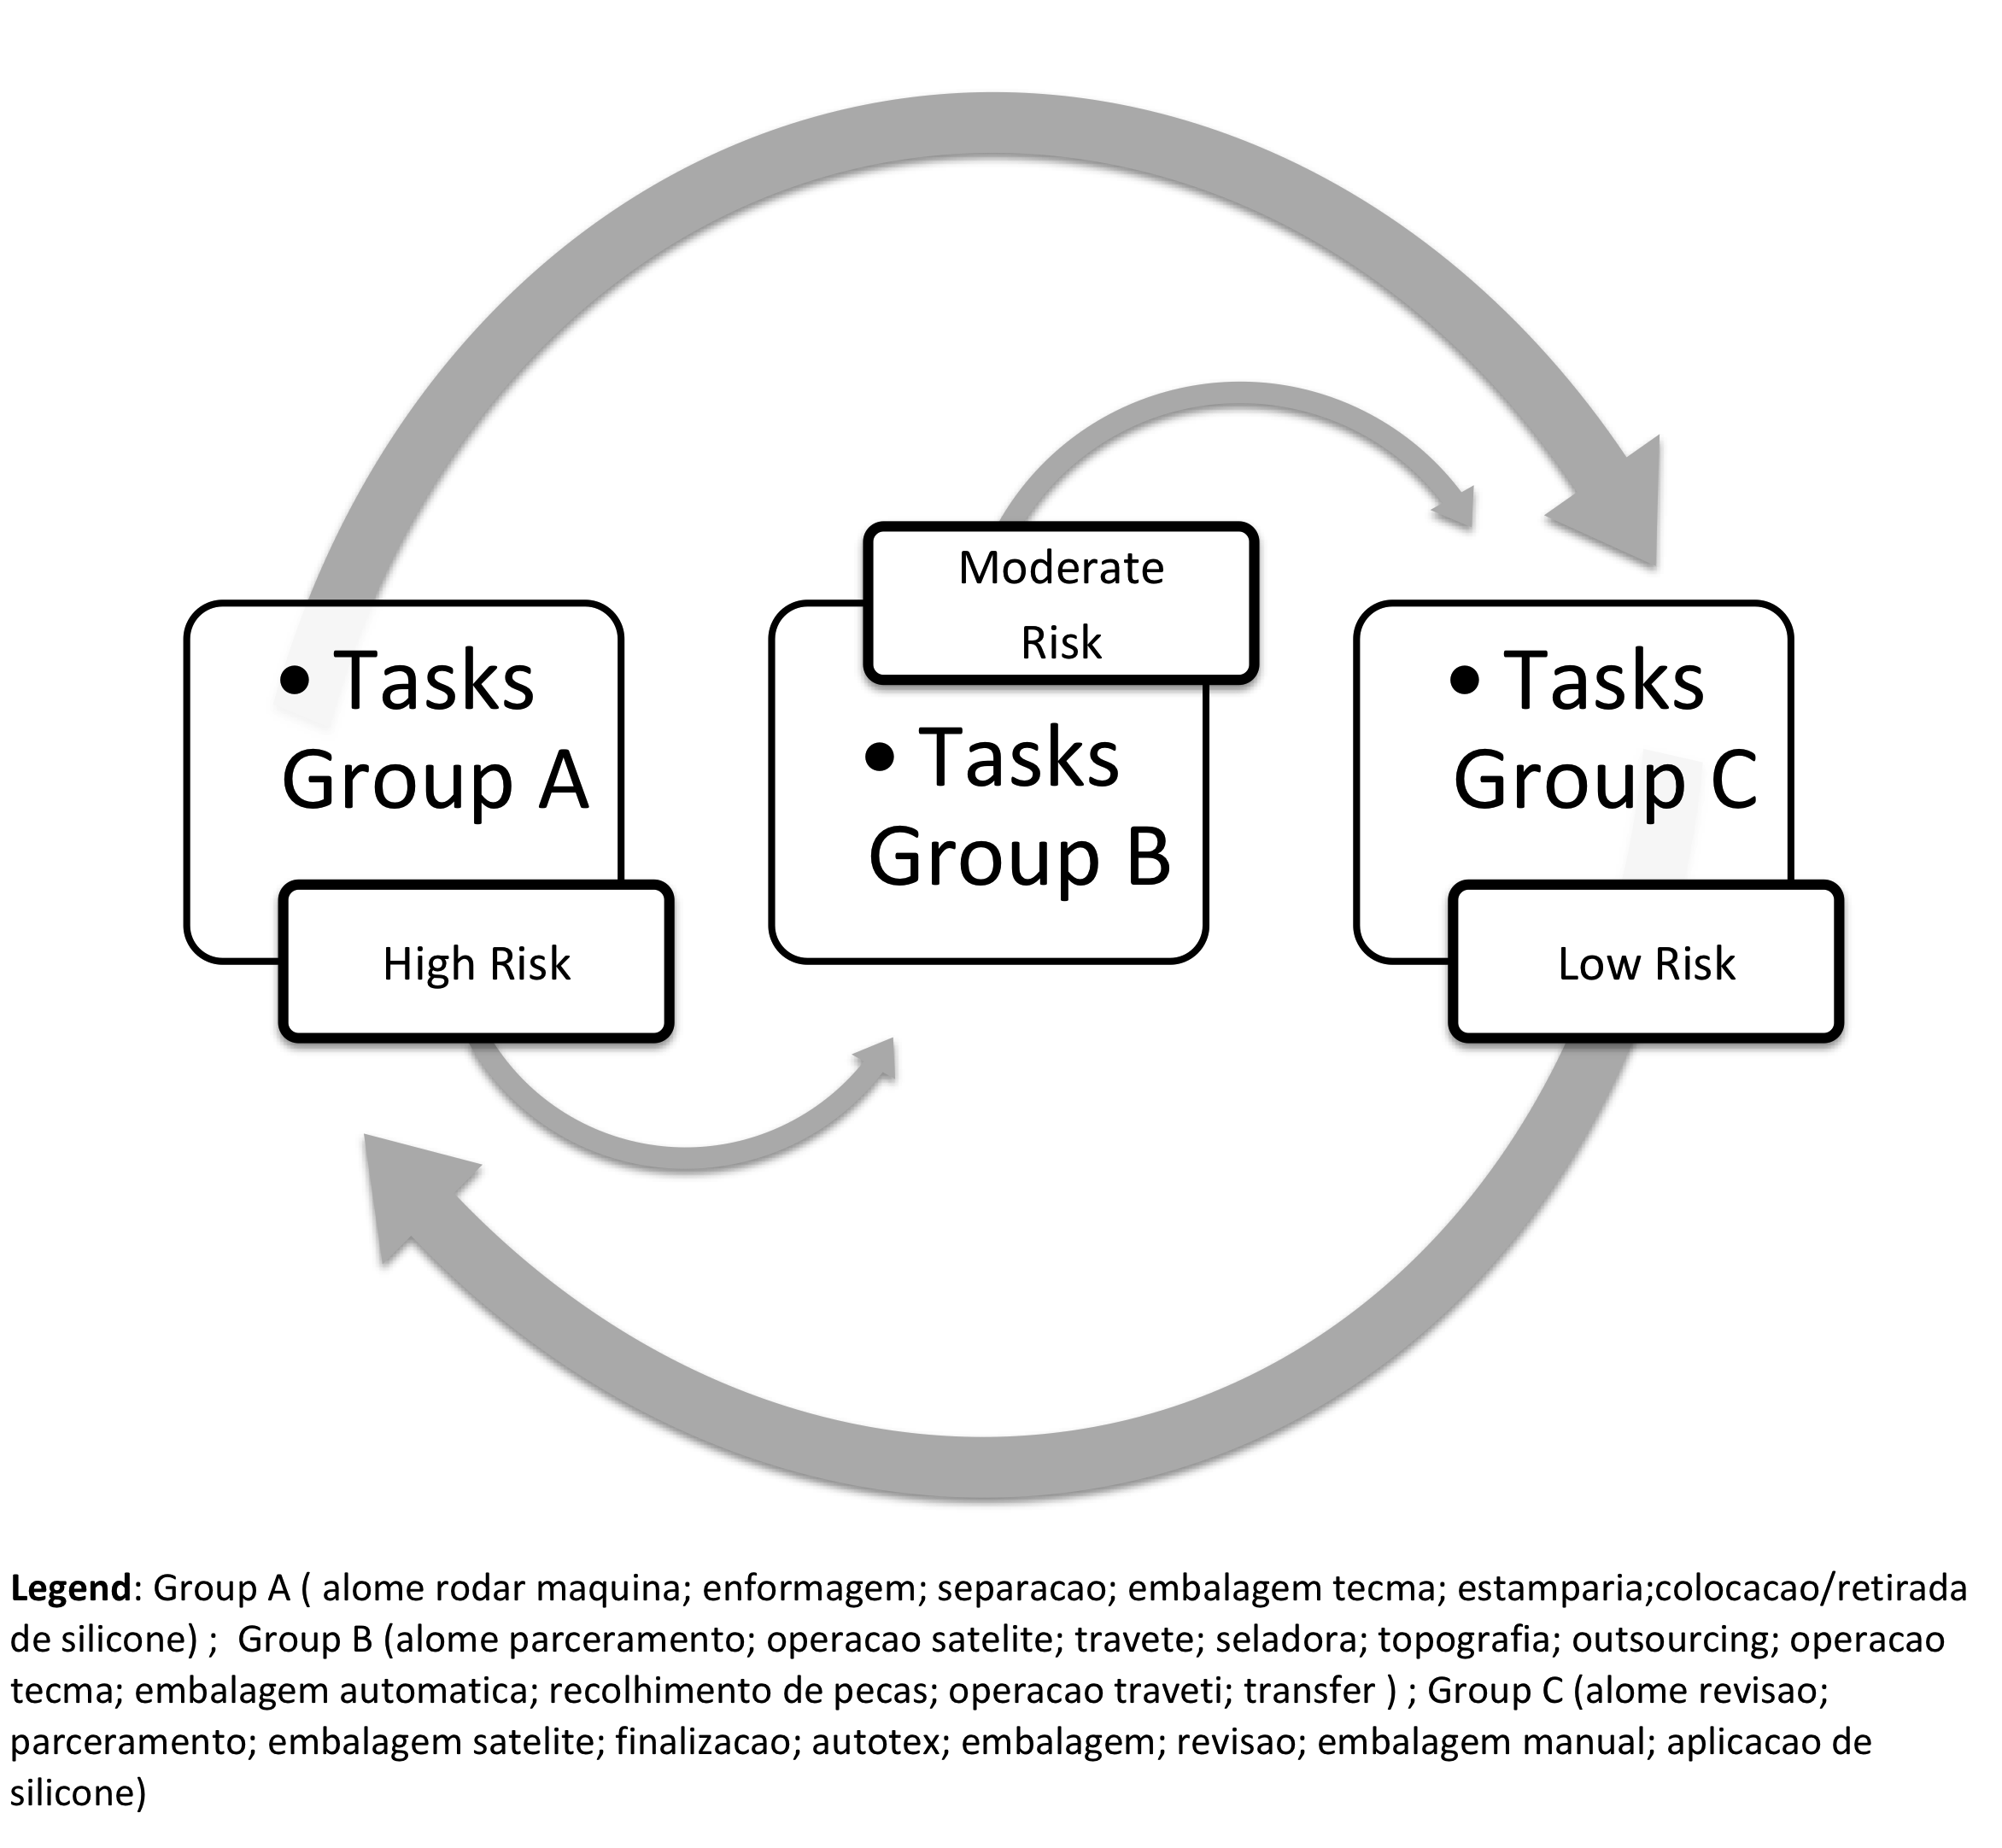


**Figure 2 – Job Rotation Desing**

**Legend:** Group A (operate Alome machine; Firsan- shaping socks; separation of product`s color and size; stamping; Tecma machine packaging; silicon preparing); Group B (Alome - choice of pair of socks; operate Satellite machine; operate Sealing machine; fix fast pin; automatic packaging); Group C (Firsan- choice of pair of socks; Satellite packing socks; Alome – socks review; manual packaging; operate Autotex machine; application of silicon; seamless products review)
